# Supplementary material for: Basolateral delivery of the type I transforming growth factor beta receptor is mediated by a dominant-acting cytoplasmic motif
Source: PubMed Central journal article supplement — Mol Biol Cell. 2017 Oct 1;28(20):2701–11. doi: 10.1091/mbc.E17-05-0334 (PMC5620377; doi:10.1091/mbc.e17-05-0334), 2017-10-01
Supplement: supp_E17-05-0334v1_CombinedSupMats.pdf [file supp_E17-05-0334v1_CombinedSupMats.pdf]

# Supplemental Materials

*Molecular Biology of the Cell*

Yin et al.

## SUPPLEMENTAL FIGURE LEGENDS

**Figure S1.** Additional T $\beta$ RI truncations, deletions, and mutations defining the basolateral targeting signal between amino acids 161-164. (A) Additional images of indicated T $\beta$ RI truncations as presented in figure 1A. (B-E) Additional images of indicated T $\beta$ RI deletions and mutations as presented in figure 1B.

**Figure S2.** Single and double T $\beta$ RI point mutations to define the basolateral targeting signal. (A-D) Additional images as in figures 2 and S1 in order to identify the amino acids comprising the T $\beta$ RI basolateral-targeting element.

**Figure S3.** T $\beta$ RI point mutations tested that did not impact basolateral targeting. (A-C) Images of transiently transfected mutated T $\beta$ RI constructs as in figure 1 that had no effect on basolateral T $\beta$ RI targeting.

**Figure S4.** VEED motif in T $\beta$ RI directs basolateral targeting to the apically expressed nerve growth factor receptor (p75). Additional images as in figure 6 depicting basolateral expression of p75 when the T $\beta$ RI wild type (WT), but not the <sup>158</sup>VxxEED<sup>163</sup> mutant (<sup>158</sup>AxxAAA<sup>163</sup>; 4X), is fused to the extracellular and transmembrane domain (p75ExTm) of the nerve growth factor receptor.

**Figure S5.** Mutation of the basolateral targeting domain in chimeric type I receptors does not affect ligand-dependent Smad3 phosphorylation. MDCK cells stably expressing wild type chimeric type I and type II TGF $\beta$ R ( $\alpha$ I $\beta$ II #7) or a wild type chimeric type II and VEED mutated chimeric type I receptor ( $\alpha$ I-4X $\beta$ II #6) were polarized as in figure 3A and treated with GM-CSF (100 ng/ml; activates chimeric receptors) or TGF- $\beta$  (10 ng/ml; activates endogenous receptors) from either the apical (AP) or basolateral (BL) transwell chamber. Following 1 hr stimulation, cells were lysed in modified RIPA buffer and phosphorylated (p) or total (t) Smad3 determined as described in Materials and Methods. Blots are representative of 3 separate experiments.

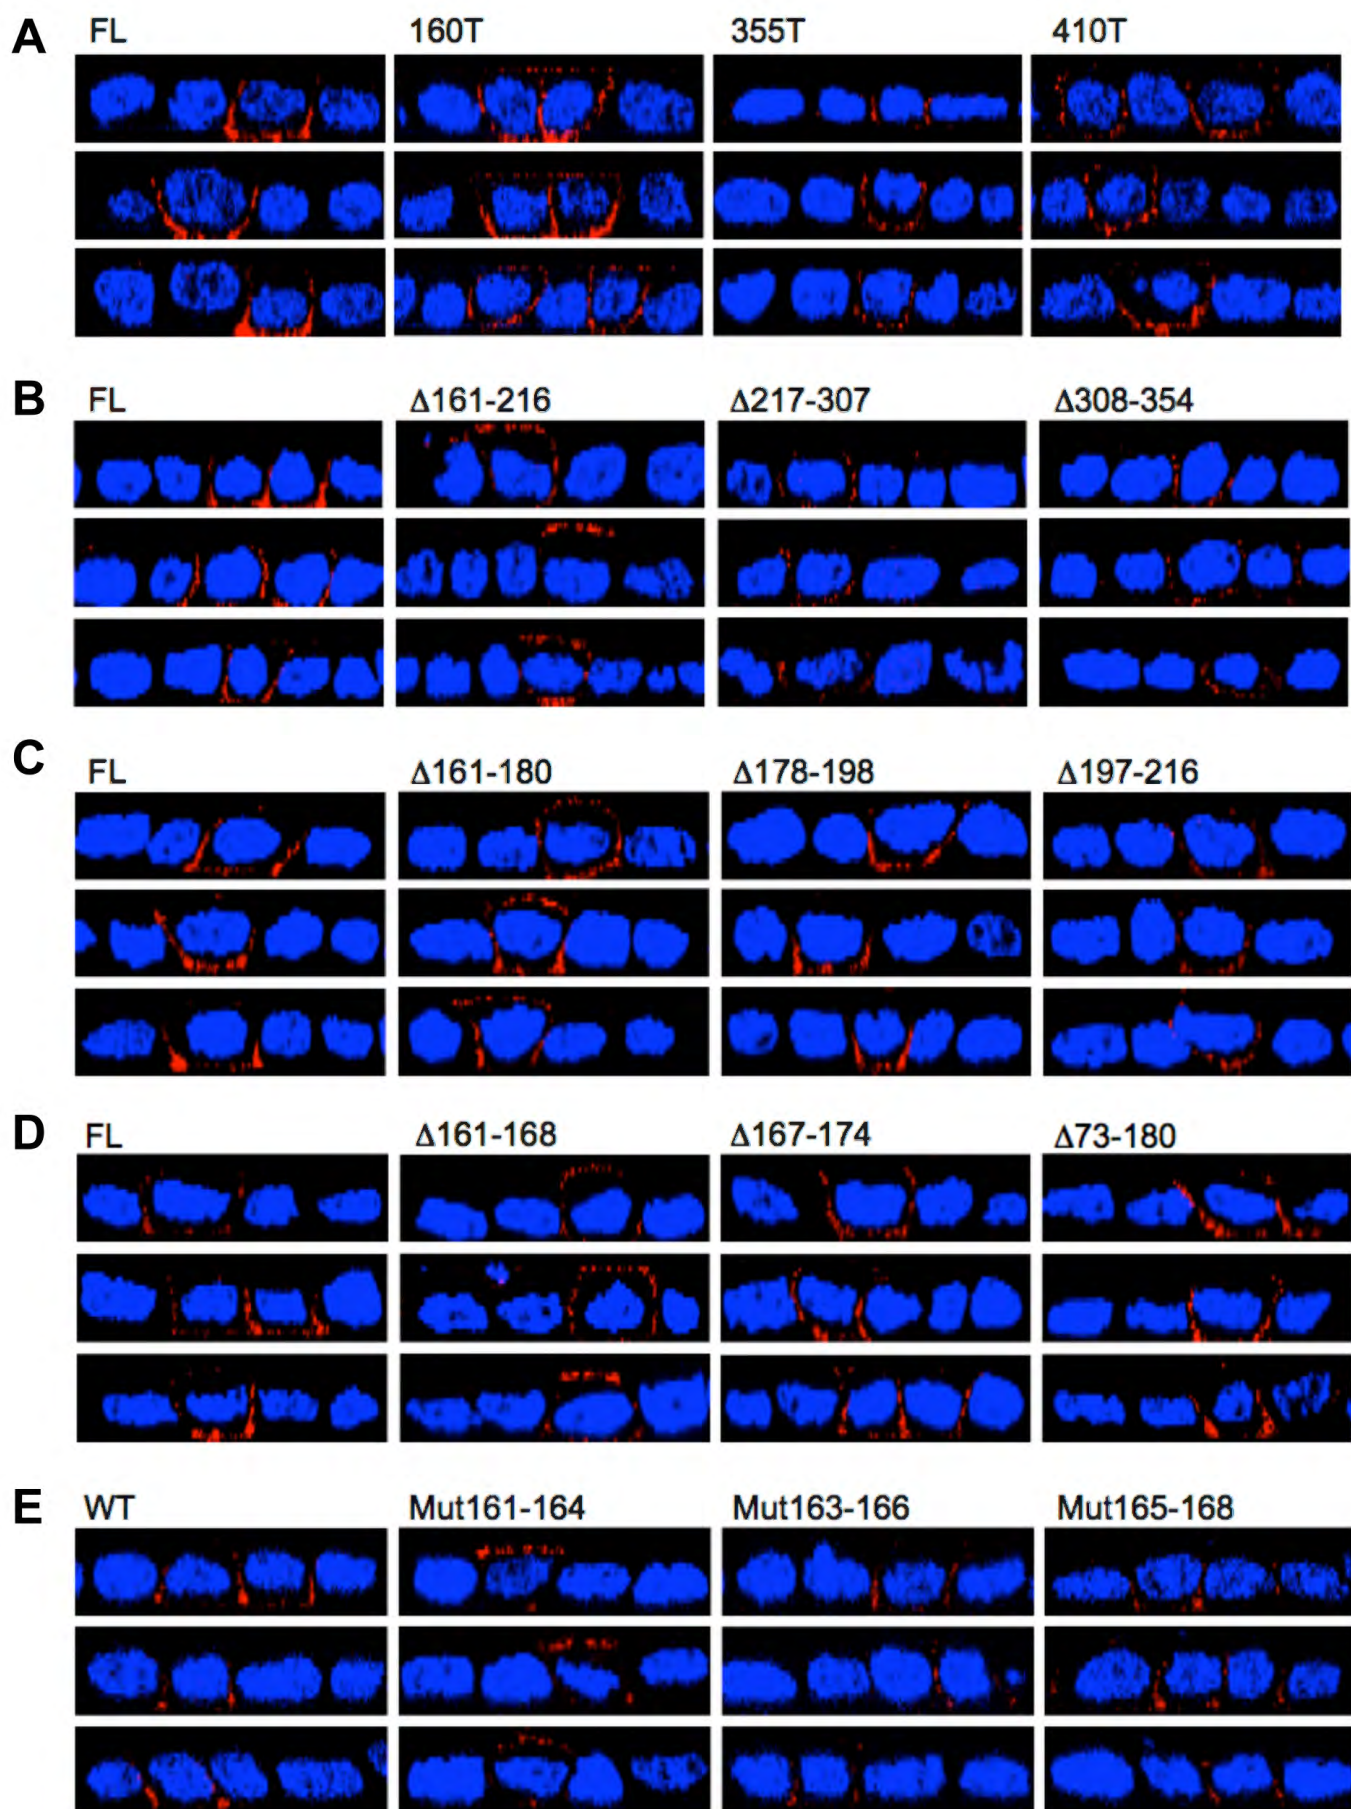

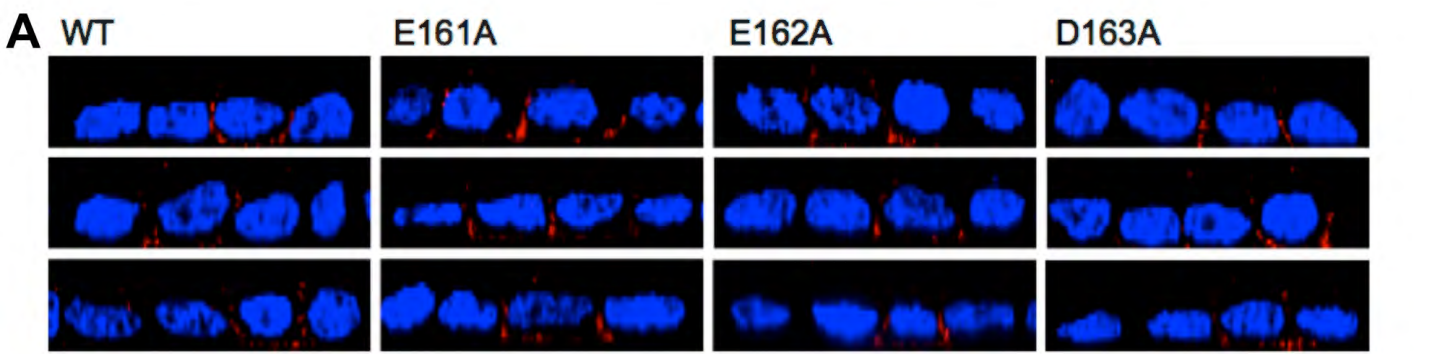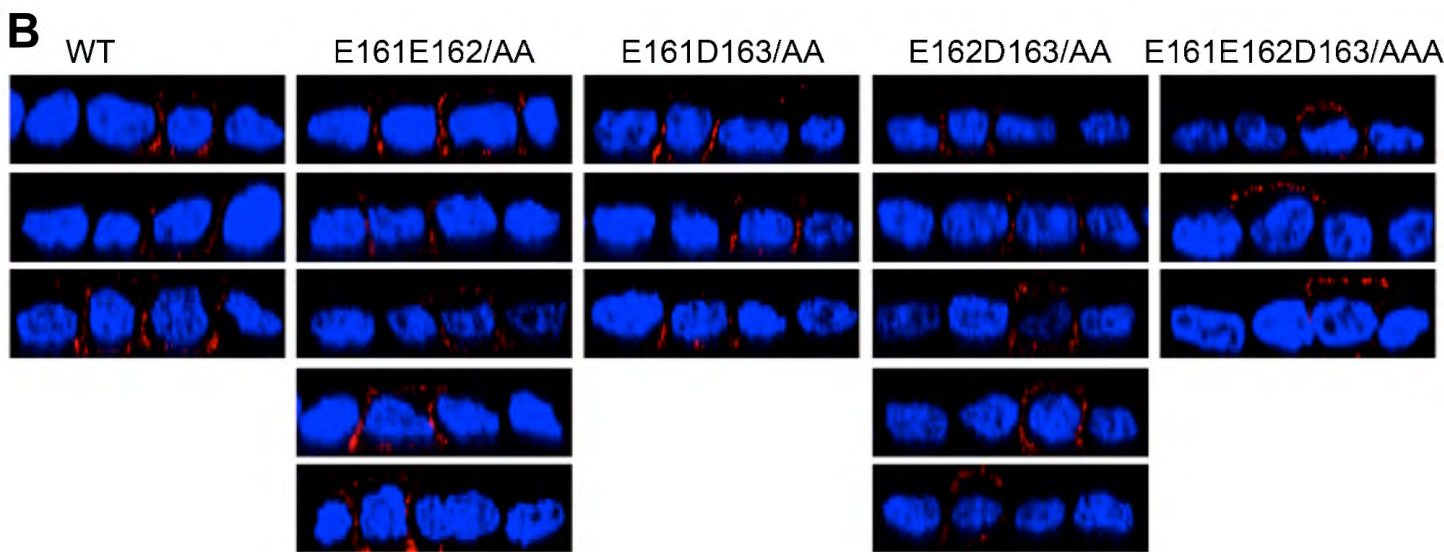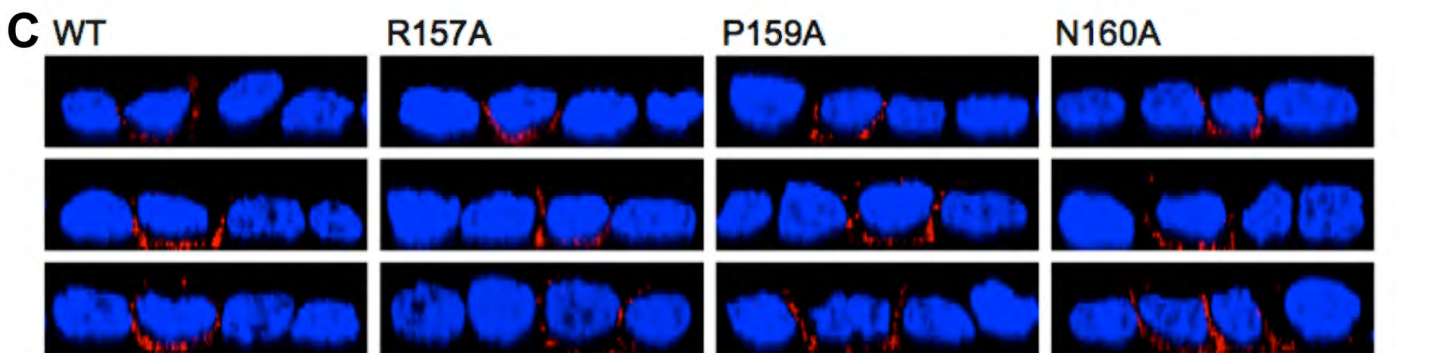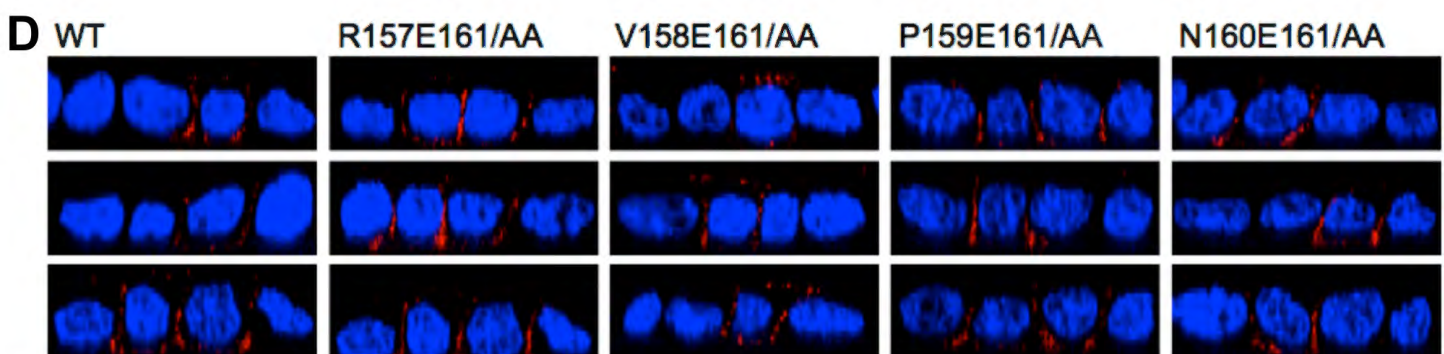

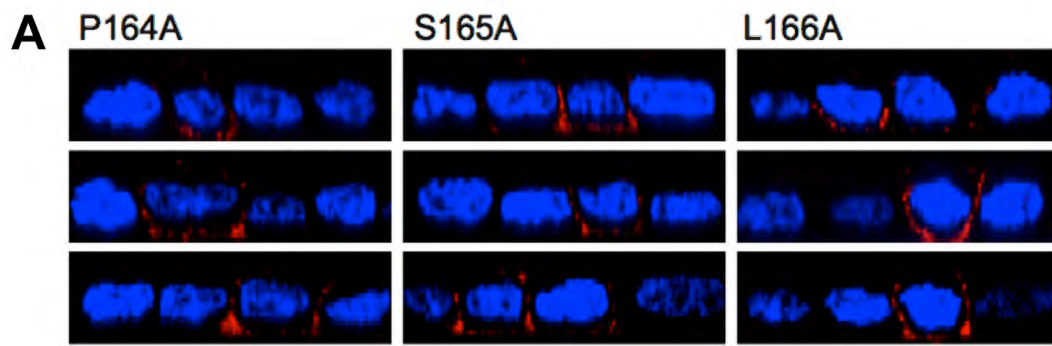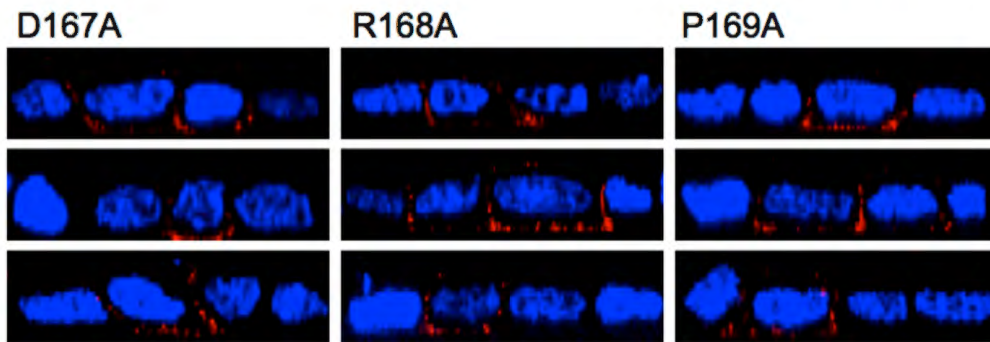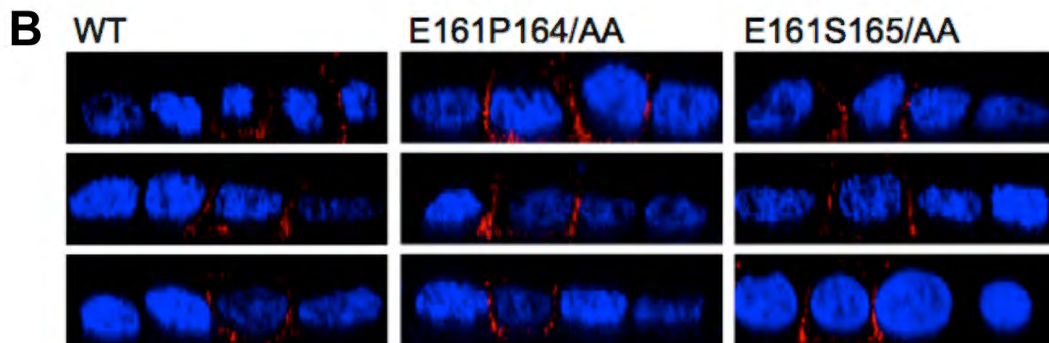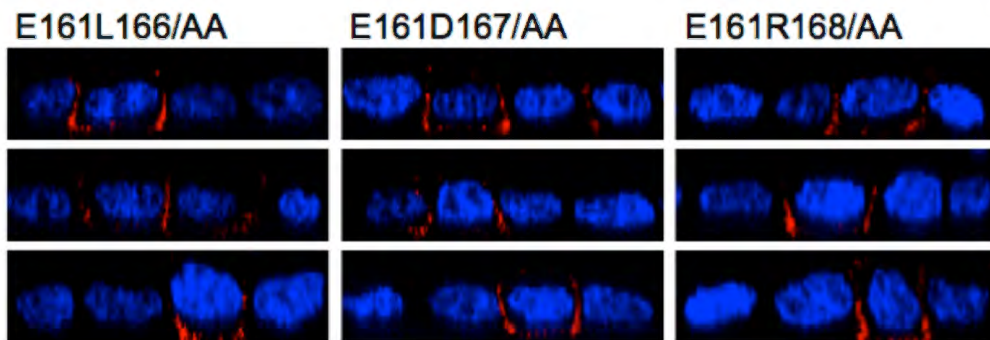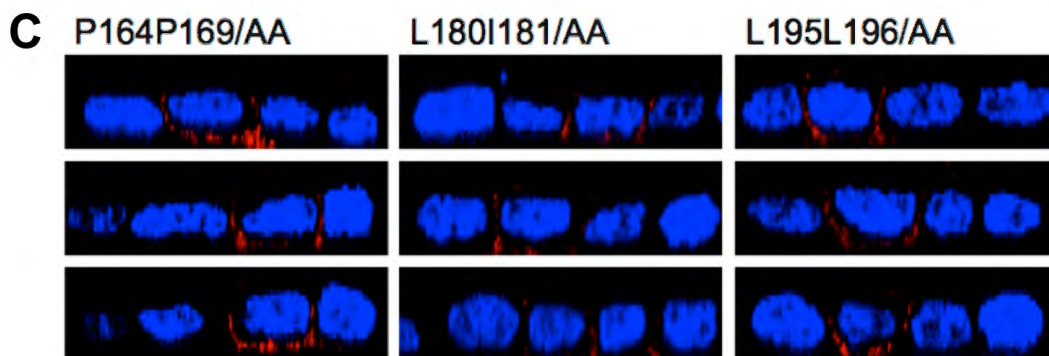

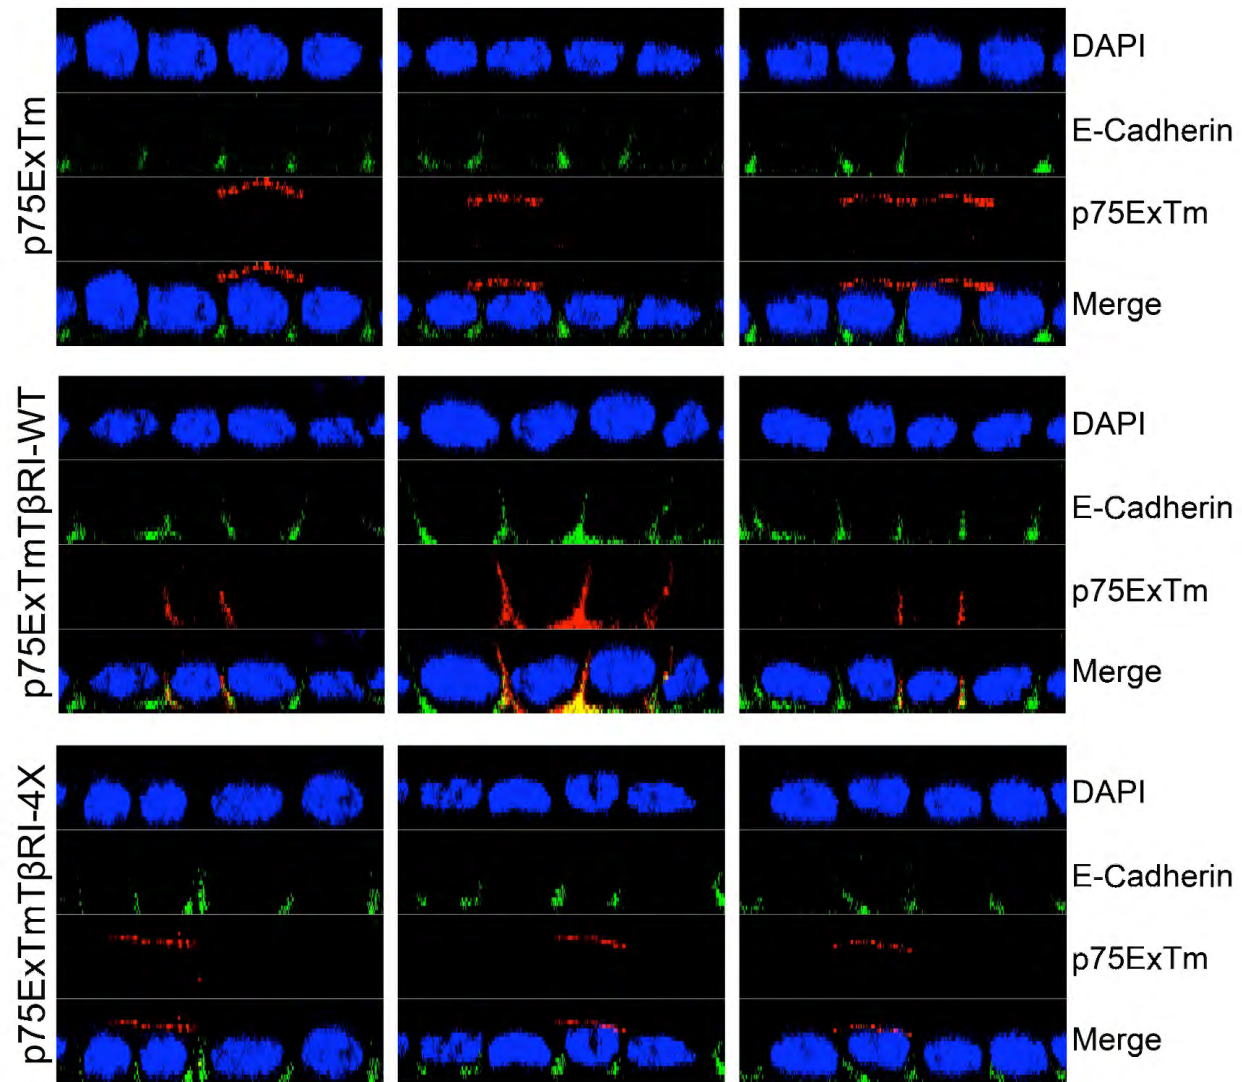

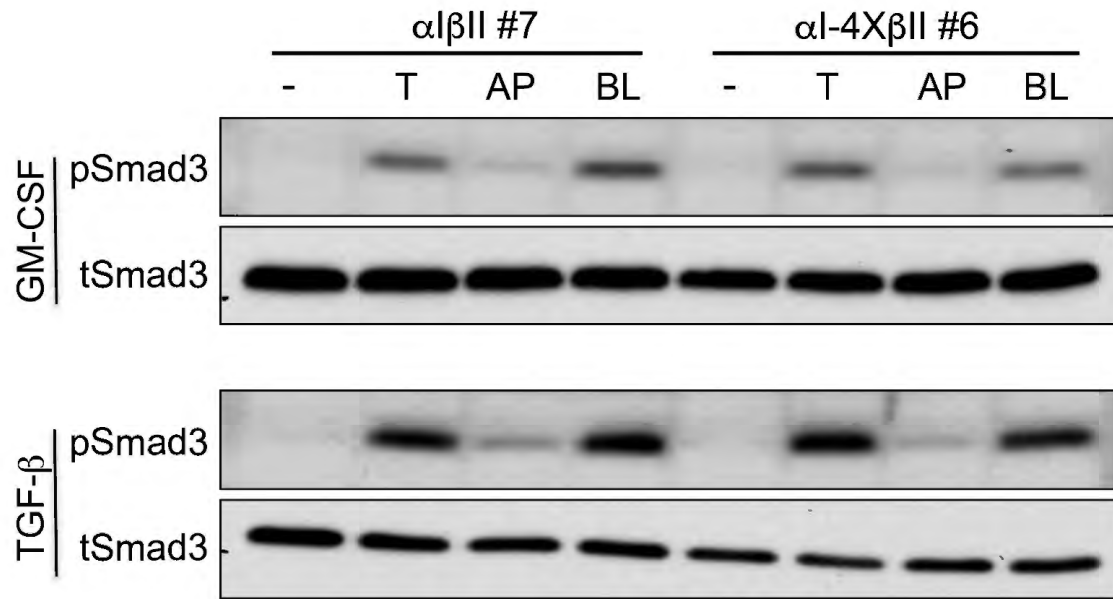

**Table S1.** Antibodies

| Antibody        | Company                                | Catalog #   | Application        | Dilution |
|-----------------|----------------------------------------|-------------|--------------------|----------|
| E-Cadherin      | Sigma                                  | U3254       | Immunofluorescence | 1:500    |
| GM-CSF $\alpha$ | Santa Cruz                             | sc-456      | Immunofluorescence | 1:50     |
| GM-CSF $\beta$  | Santa Cruz                             | sc-21765    | Immunofluorescence | 1:50     |
| IgG (mouse)     | Jackson Laboratories                   | 715-165-150 | Immunofluorescence | 1:250    |
| IgG (rabbit)    | Jackson Laboratories                   | 711-165-152 | Immunofluorescence | 1:250    |
| IgG (rat)       | Invitrogen                             | A21208      | Immunofluorescence | 1:250    |
| Myc             | Cell Signaling                         | 2278        | Immunofluorescence | 1:100    |
| p75             | Santa Cruz                             | sc-13577    | Immunofluorescence | 1:100    |
| GAPDH           | Millipore                              | MAB374      | Western Blotting   | 1:10,000 |
| E-Cadherin      | BD Biologicals                         | 610181      | Western Blotting   | 1:10,000 |
| GM-CSF $\alpha$ | Santa Cruz                             | sc-456      | Western Blotting   | 1:1000   |
| GM-CSF $\beta$  | Santa Cruz                             | sc-676      | Western Blotting   | 1:1000   |
| IgG (mouse)     | Santa Cruz                             | sc-2005     | Western Blotting   | 1:10,000 |
| IgG (rabbit)    | Santa Cruz                             | sc-2004     | Western Blotting   | 1:10,000 |
| pSmad3          | Lab Made (Wilkes <i>et al.</i> , 2003) | N/A         | Western Blotting   | 1:5,000  |
| Smad3           | Abcam                                  | ab28379     | Western Blotting   | 1:2000   |
| T $\beta$ R1    | Santa Cruz                             | sc-398      | Western Blotting   | 1:1,000  |
| T $\beta$ R2    | Santa Cruz                             | sc-220      | Western Blotting   | 1:1,000  |

Wilkes, M.C., Murphy, S.J., Garamszegi, N., and Leof, E.B. (2003). Cell-type-specific activation of PAK2 by transforming growth factor  $\beta$  independent of Smad2 and Smad3. *Mol Cell Biol* 23, 8878-8889.
